# Supplementary material for: Characterization of Naturally Occurring Bioactive Factor Mixtures for Bone Regeneration
Source: PubMed Central journal article supplement (PMC7073126; doi:10.3390/ijms21041412), 2020-02-19
Supplement: ijms-21-01412-s001.pdf [file ijms-21-01412-s001.pdf]

# Characterization of Naturally Occurring Bioactive Factor Mixtures for Bone Regeneration

Henriette Bretschneider <sup>1,2</sup>, Mandy Quade <sup>2</sup>, Anja Lode <sup>2</sup>, Michael Gelinsky <sup>2</sup>, Stefan Rammelt <sup>1</sup>, Stefan Zwingenberger <sup>1,2</sup>, Klaus-Dieter Schaser <sup>1</sup> and Corina Vater <sup>1,2,\*</sup>

<sup>1</sup> University Center of Orthopaedics and Traumatology, University Hospital Carl Gustav Carus of Technische Universität Dresden, Fetscherstraße 74, 01307 Dresden, Germany; henriette.bretschneider@uniklinikum-dresden.de (H.B.), stefan.rammelt@uniklinikum-dresden.de (S.R.), stefan.zwingenberger@uniklinikum-dresden.de (S.Z.), klaus-dieter.schaser@uniklinikum-dresden.de (K.-D.S.)

<sup>2</sup> Centre for Translational Bone, Joint and Soft Tissue Research, University Hospital Carl Gustav Carus and Faculty of Medicine of Technische Universität Dresden, Fetscherstraße 74, 01307 Dresden, Germany; mandy.quade@tu-dresden.de (M.Q.), anja.lode@tu-dresden.de (A.L.), michael.gelinsky@tu-dresden.de (M.G.)

\* Correspondence: corina.vater@uniklinikum-dresden.de

Table S1: Results of the proteome profiler array of 55 human angiogenesis-related proteins (Proteome Profiler Human Angiogenesis Array Kit, R&D, USA); - protein not detected; + lower, ++ middle, +++ upper third of measured proteins.

Table S2: Results of the proteome profiler array of 36 cyto- and chemokines (Proteome Profiler Human Cytokine Array Kit, R&D, USA); - chemokine not detected; + lower, ++ middle, +++ upper third of measured chemokines.

|                             | PL  | HCM | ATE |
|-----------------------------|-----|-----|-----|
| CCL2/MCP-1                  | -   | +++ | +++ |
| CCL5/RANTES                 | ++  | -   | -   |
| Complement Component C5/C5a | +   | ++  | ++  |
| CD40 Ligand/TNFSF5          | +++ | -   | -   |
| CXCL1/GRO $\alpha$          | ++  | +   | ++  |
| CXCL12/SDF-1                | +   | -   | -   |
| G-CSF                       | -   | -   | ++  |
| GM-CSF                      | -   | +   | +   |
| ICAM-1/CD54                 | ++  | ++  | ++  |
| IL-1 $\beta$ /IL-1F2        | -   | -   | ++  |
| IL-1ra/IL-1F3               | -   | -   | ++  |
| IL-6                        | -   | +++ | +++ |
| IL-8                        | -   | +++ | ++  |
| IL-16                       | +   | -   | +   |
| IL-18/IL-1F4                | +++ | -   | -   |
| MIF                         | +   | +++ | ++  |
| Serpin E1/PAI-1             | +   | +++ | ++  |

|                           | PL  | HCM | ATE |
|---------------------------|-----|-----|-----|
| Activin A                 | -   | +   | -   |
| Angiogenin                | +++ | +++ | +++ |
| Angiopoietin-1            | ++  | -   | +   |
| Angiopoietin-2            | -   | -   | +++ |
| Angiogenin                | -   | +++ | -   |
| Amphiregulin              | -   | +   | +   |
| Coagulation Factor III    | -   | +   | ++  |
| CXCL16                    | -   | ++  | ++  |
| DPPIV                     | ++  | +++ | +++ |
| EGF                       | +   | -   | -   |
| Endoglin                  | ++  | ++  | -   |
| Endostatin/Collagen XVIII | ++  | ++  | +++ |
| Endothelin-1              | -   | ++  | -   |
| FGF basic                 | +   | -   | +   |
| FGF acidic                | -   | +   | ++  |
| GDNF                      | -   | +   | +   |
| GM-CSF                    | -   | ++  | +++ |
| HB-EGF                    | ++  | +   | +   |
| HGF                       | -   | -   | +   |
| IGFBP-1                   | +++ | +++ | +++ |
| IGFBP-2                   | ++  | ++  | ++  |
| IGFBP-3                   | ++  | ++  | +++ |
| IL-1 $\beta$              | -   | -   | ++  |
| IL-8                      | -   | +++ | ++  |
| LAP (TGF- $\beta$ 1)      | ++  | +   | -   |
| Leptin                    | -   | -   | +++ |
| MCP-1                     | -   | +++ | +++ |
| MIP-1 $\alpha$            | -   | +   | +   |
| MMP-8                     | ++  | +   | ++  |
| MMP-9                     | ++  | +   | ++  |
| NRG1- $\beta$ 1           | -   | -   | +   |
| Pentaxin 3 (PTX3)         | -   | +++ | +++ |
| PD-ECGF                   | -   | -   | ++  |
| PDGF-AA                   | +++ | -   | +   |
| PDGF-AB/PDGF-BB           | ++  | -   | -   |
| Platelet Factor 4 (PF4)   | -   | +++ | +++ |
| PIGF                      | -   | -   | ++  |
| Prolactin                 | -   | -   | ++  |
| Serpin B5                 | -   | +   | +   |
| Serpin E1                 | +   | ++  | ++  |
| Serpin F1                 | +   | ++  | ++  |
| TIMP-1                    | ++  | ++  | +++ |
| TIMP-4                    | -   | +   | +++ |
| Thrombospondin 1          | -   | +++ | +++ |

|                  |    |     |     |
|------------------|----|-----|-----|
| Thrombospondin 2 | -  | ++  | +   |
| μPA              | +  | +++ | +++ |
| Vasohibin        | -  | -   | +   |
| VEGF             | ++ | ++  | +++ |
| VEGF-C           | -  | -   | +   |
